# Supplementary material
Source: ML conference proceedings conference paper supplement (https://openaccess.thecvf.com/content/WACV2025/html/Yang_ReFu_Recursive_Fusion_WACV_2025_paper.html)
Supplement: Supplementary file 1 [file Yang_ReFu_Recursive_Fusion_WACV_2025_supplemental.pdf]

# Supplementary Materials for ReFu: Recursive Fusion for Exemplar-Free 3D Class-Incremental Learning

Yi Yang<sup>1</sup> Lei Zhong<sup>1</sup> Huiping Zhuang<sup>2</sup>

<sup>1</sup>The University of Edinburgh <sup>2</sup>South China University of Technology

{y.yang-249, L.Zhong-10}@sms.ed.ac.uk hpzhuang@scut.edu.cn

## 1. Proof of Theorem 1

In phase  $n - 1$ , we have the weight matrix as follows:

$$\hat{\mathbf{W}}_{n-1} = \left( \sum_{n'=0}^{n-1} \mathbf{A}_{n'} + \eta \mathbf{I} \right)^{-1} \left( \sum_{n'=0}^{n-1} \mathbf{C}_{n'} \right) \quad (1)$$

where  $\mathbf{A}_{n'}$  and  $\mathbf{C}_{n'}$  represent the auto-correlation and cross-correlation matrices. These matrices are defined as:

$$\mathbf{A}_{n'} = \left( \mathbf{F}_{n'}^{\text{RP}} \right)^\top \mathbf{F}_{n'}^{\text{RP}}, \quad \mathbf{C}_{n'} = \left( \mathbf{F}_{n'}^{\text{RP}} \right)^\top \mathbf{Y}_{n'}^{\text{train}} \quad (2)$$

Similarly, at phase  $n$ , we have:

$$\hat{\mathbf{W}}_n = \left( \sum_{n'=0}^n \mathbf{A}_{n'} + \eta \mathbf{I} \right)^{-1} \left( \sum_{n'=0}^n \mathbf{C}_{n'} \right) \quad (3)$$

In the paper, we define the regularized auto-correlation matrix at phase  $n - 1$  as:

$$\mathbf{R}_{n-1} = \left( \sum_{n'=0}^{n-1} \mathbf{A}_{n'} + \eta \mathbf{I} \right)^{-1} \quad (4)$$

At phase  $n$ , we have:

$$\begin{aligned} \mathbf{R}_n &= \left( \sum_{n'=0}^n \mathbf{A}_{n'} + \eta \mathbf{I} \right)^{-1} \\ &= \left( \sum_{n'=0}^{n-1} \mathbf{A}_{n'} + \mathbf{A}_n + \eta \mathbf{I} \right)^{-1} = \left( \mathbf{R}_{n-1}^{-1} + \mathbf{A}_n \right)^{-1} = \left( \mathbf{R}_{n-1}^{-1} + \left( \mathbf{F}_n^{\text{RP}} \right)^\top \mathbf{F}_n^{\text{RP}} \right)^{-1} \end{aligned} \quad (5)$$

According to the Woodbury matrix identity, we have:

$$(\mathbf{A} + \mathbf{UCV})^{-1} = \mathbf{A}^{-1} - \mathbf{A}^{-1} \mathbf{U} (\mathbf{VA}^{-1} \mathbf{U} + \mathbf{C}^{-1}) \mathbf{VA}^{-1} \quad (6)$$

By setting  $\mathbf{A} = \mathbf{R}_{n-1}^{-1}$ ,  $\mathbf{U} = (\mathbf{F}_n^{\text{RP}})^\top$ ,  $\mathbf{C} = \mathbf{I}$ , and  $\mathbf{V} = \mathbf{F}_n^{\text{RP}}$  in Equation (5), this leads to the following update:

$$\mathbf{R}_n = \mathbf{R}_{n-1} - \mathbf{R}_{n-1} (\mathbf{F}_n^{\text{RP}})^\top \left( \mathbf{F}_n^{\text{RP}} \mathbf{R}_{n-1} (\mathbf{F}_n^{\text{RP}})^\top + \mathbf{I} \right)^{-1} \mathbf{F}_n^{\text{RP}} \mathbf{R}_{n-1} \quad (7)$$

This expression exemplifies the recursive nature of the updates for  $\mathbf{R}_n$ , using the prior matrix  $\mathbf{R}_{n-1}$  and incorporating new feature data  $\mathbf{F}_n^{\text{RP}}$ . This proof completes the mathematical formulation for the recursive calculation of  $\mathbf{R}_n$ .

Next, we derive the recursive calculation of  $\hat{\mathbf{W}}_n$ . To this end, we first recursively calculate  $\sum_{n'=0}^n \mathbf{C}_{n'}$ , i.e.,

$$\sum_{n'=0}^n \mathbf{C}_{n'} = \sum_{n'=0}^{n-1} \mathbf{C}_{n'} + \mathbf{C}_n = \sum_{n'=0}^{n-1} \mathbf{C}_{n'} + (\mathbf{F}_n^{\text{RP}})^\top \mathbf{Y}_n^{\text{train}} \quad (8)$$

Let  $\mathbf{K}_n = \left( \mathbf{F}_n^{\text{RP}} \mathbf{R}_{n-1} (\mathbf{F}_n^{\text{RP}})^\top + \mathbf{I} \right)^{-1}$ . Since

$$\mathbf{I} = \mathbf{K}_n \mathbf{K}_n^{-1} = \mathbf{K}_n \left( \mathbf{F}_n^{\text{RP}} \mathbf{R}_{n-1} (\mathbf{F}_n^{\text{RP}})^\top + \mathbf{I} \right) \quad (9)$$

we have

$$\mathbf{K}_n = \mathbf{I} - \mathbf{K}_n \mathbf{F}_n^{\text{RP}} \mathbf{R}_{n-1} (\mathbf{F}_n^{\text{RP}})^\top.$$

Therefore,

$$\begin{aligned} & \mathbf{R}_{n-1} (\mathbf{F}_n^{\text{RP}})^\top \left( \mathbf{F}_n^{\text{RP}} \mathbf{R}_{n-1} (\mathbf{F}_n^{\text{RP}})^\top + \mathbf{I} \right)^{-1} \\ &= \mathbf{R}_{n-1} (\mathbf{F}_n^{\text{RP}})^\top \mathbf{K}_n \\ &= \mathbf{R}_{n-1} (\mathbf{F}_n^{\text{RP}})^\top \left( \mathbf{I} - \mathbf{K}_n \mathbf{F}_n^{\text{RP}} \mathbf{R}_{n-1} (\mathbf{F}_n^{\text{RP}})^\top \right) \\ &= \left( \mathbf{R}_{n-1} - \mathbf{R}_{n-1} (\mathbf{F}_n^{\text{RP}})^\top \mathbf{K}_n \mathbf{F}_n^{\text{RP}} \mathbf{R}_{n-1} \right) (\mathbf{F}_n^{\text{RP}})^\top \\ &= \mathbf{R}_n (\mathbf{F}_n^{\text{RP}})^\top \end{aligned} \quad (10)$$

Consequently, the updated weight matrix  $\hat{\mathbf{W}}_n$  can be expressed as follows:

$$\begin{aligned} \hat{\mathbf{W}}_n &= \mathbf{R}_n \sum_{n'=0}^n \mathbf{C}_{n'} \\ &= \mathbf{R}_n \left( \sum_{n'=0}^{n-1} \mathbf{C}_{n'} + (\mathbf{F}_n^{\text{RP}})^\top \mathbf{Y}_n^{\text{train}} \right) \\ &= \mathbf{R}_n \sum_{n'=0}^{n-1} \mathbf{C}_{n'} + \mathbf{R}_n (\mathbf{F}_n^{\text{RP}})^\top \mathbf{Y}_n^{\text{train}} \end{aligned} \quad (11)$$

By substituting (7) into  $\mathbf{R}_n \sum_{n'=0}^{n-1} \mathbf{C}_{n'}$ , we have:

$$\begin{aligned}
& \mathbf{R}_n \sum_{n'=0}^{n-1} \mathbf{C}_{n'} \\
&= \mathbf{R}_{n-1} \sum_{n'=0}^{n-1} \mathbf{C}_{n'} - \mathbf{R}_{n-1} \left( \mathbf{F}_n^{\text{RP}} \right)^\top \left( \mathbf{F}_n^{\text{RP}} \mathbf{R}_{n-1} \left( \mathbf{F}_n^{\text{RP}} \right)^\top + \mathbf{I} \right)^{-1} \mathbf{F}_n^{\text{RP}} \mathbf{R}_{n-1} \sum_{n'=0}^{n-1} \mathbf{C}_{n'} \\
&= \hat{\mathbf{W}}_{n-1} - \mathbf{R}_{n-1} \left( \mathbf{F}_n^{\text{RP}} \right)^\top \left( \mathbf{F}_n^{\text{RP}} \mathbf{R}_{n-1} \left( \mathbf{F}_n^{\text{RP}} \right)^\top + \mathbf{I} \right)^{-1} \mathbf{F}_n^{\text{RP}} \hat{\mathbf{W}}_{n-1}
\end{aligned} \tag{12}$$

According to (10), (12) can be rewritten as:

$$\mathbf{R}_n \sum_{n'=0}^{n-1} \mathbf{C}_{n'} = \hat{\mathbf{W}}_{n-1} - \mathbf{R}_n \left( \mathbf{F}_n^{\text{RP}} \right)^\top \mathbf{F}_n^{\text{RP}} \hat{\mathbf{W}}_{n-1} \tag{13}$$

By inserting (13) into (11), we have:

$$\begin{aligned}
\hat{\mathbf{W}}_n &= \hat{\mathbf{W}}_{n-1} - \mathbf{R}_n \left( \mathbf{F}_n^{\text{RP}} \right)^\top \mathbf{F}_n^{\text{RP}} \hat{\mathbf{W}}_{n-1} + \mathbf{R}_n \left( \mathbf{F}_n^{\text{RP}} \right)^\top \mathbf{Y}_n^{\text{train}} \\
&= \hat{\mathbf{W}}_{n-1} - \mathbf{R}_n \mathbf{A}_n \hat{\mathbf{W}}_{n-1} + \mathbf{R}_n \mathbf{C}_n
\end{aligned} \tag{14}$$

which proves the recursive calculation of  $\hat{\mathbf{W}}_n$ .
